# Supplementary material for: Effects of substituent branching and chirality on the physical properties of ionic liquids based on cationic ruthenium sandwich complexes
Source: Royal Society of Chemistry journal article supplement (doi:10.1039/c6cp00643d), 2016-01-01
Supplement: c6cp00643d1.pdf [file c6cp00643d1.pdf]

## Supporting Information

### Effects of substituent branching and chirality on physical properties of ionic liquids based on cationic ruthenium sandwich complexes

Tomomi Higashi, Takahiro Ueda, Tomoyuki Mochida\*

Department of Chemistry, Graduate School of Science, Kobe University, Kobe, Hyogo 657-8501,

Japan. E-mail: tmochida@platinum.kobe-u.ac.jp

(a) *rac*-[1][PF<sub>6</sub>]

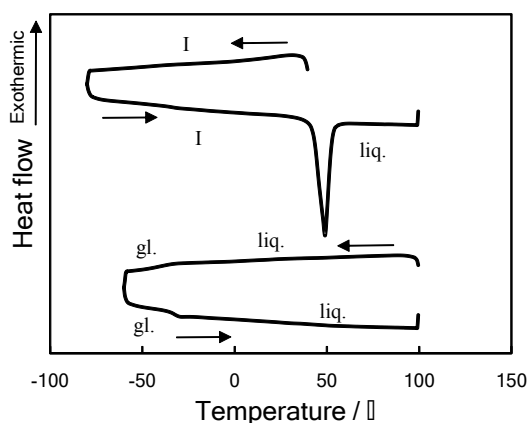

(b) *chiral*-[1][PF<sub>6</sub>]

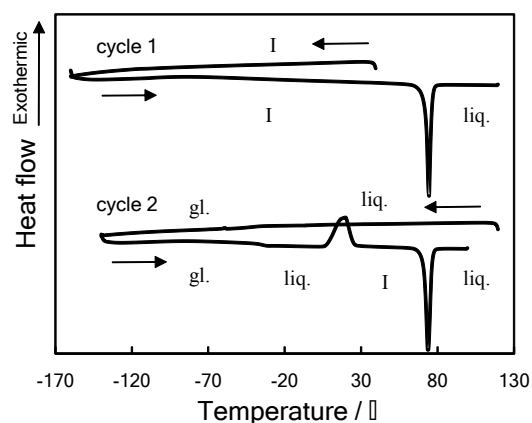

(c) [2][PF<sub>6</sub>]

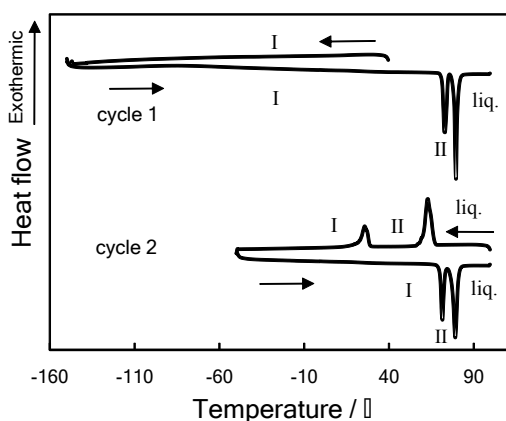

(d) [3][PF<sub>6</sub>]

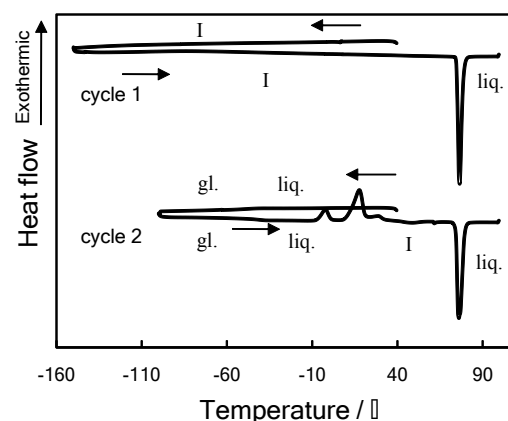

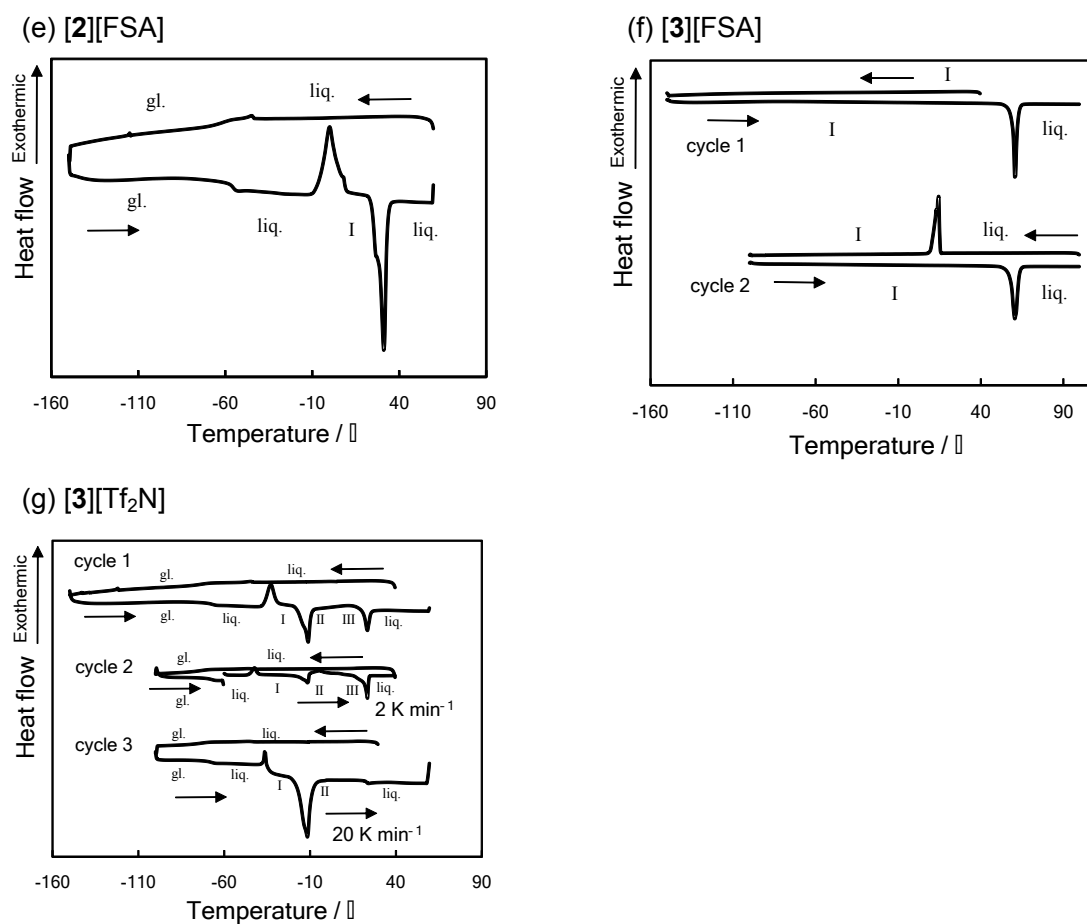

**Fig. S1** DSC traces of salts that exhibited melting (*gl.*: glassy phase, *liq.*: liquid phase).

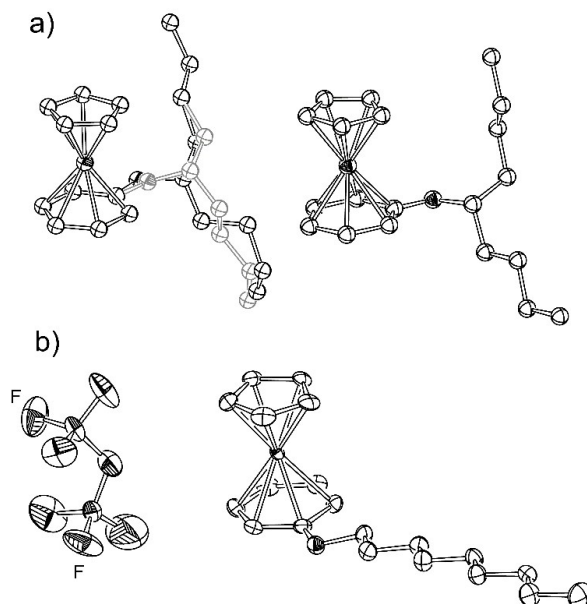

**Fig. S2** Ortep diagrams of molecular structures of (a) **[2][PF<sub>6</sub>]** and (b) **[3][FSA]**. One of the disordered parts in the substituent in **[2][PF<sub>6</sub>]** is displayed in gray.

**Table S1** Viscosity data (mPa s) for [1]X (X = PF<sub>6</sub>, FSA, Tf<sub>2</sub>N) and [3][Tf<sub>2</sub>N]

| °C  | <i>rac</i> -[1][PF <sub>6</sub> ] | <i>rac</i> -[1][FSA] | <i>rac</i> -[1][Tf <sub>2</sub> N] | [3][Tf <sub>2</sub> N] |
|-----|-----------------------------------|----------------------|------------------------------------|------------------------|
| -20 |                                   | 40300                | 40300                              | 9300                   |
| -15 |                                   | 23800                | 22200                              | 5980                   |
| -10 |                                   | 13200                | 12100                              | 3820                   |
| -5  |                                   | 7440                 | 6850                               | 2320                   |
| 0   |                                   | 4710                 | 4260                               | 1580                   |
| 5   | 248000                            | 3020                 | 2720                               | 1090                   |
| 10  | 118000                            | 1970                 | 1800                               | 766                    |
| 15  | 61900                             | 1350                 | 1220                               | 543                    |
| 20  | 33600                             | 960                  | 861                                | 409                    |
| 25  | 19600                             | 700                  | 623                                | 312                    |
| 30  | 11800                             | 511                  | 447                                | 239                    |
| 35  | 7420                              | 381                  | 336                                | 187                    |
| 40  | 5040                              | 285                  | 251                                | 147                    |
| 45  | 2840                              | 221                  | 189                                | 115                    |
| 50  | 1860                              | 173                  | 146                                | 92                     |

**Table S2** Viscosity data (mPa s) for [2][FSA]

| °C | [2][FSA] |
|----|----------|
| -9 | 23800    |
| -5 | 14700    |
| -1 | 9680     |
| 5  | 5440     |
| 9  | 3790     |
| 15 | 2340     |
| 19 | 1700     |
| 25 | 1110     |
| 29 | 836      |
| 35 | 554      |
| 39 | 430      |
| 45 | 292      |
| 50 | 218      |

**Table S3** Viscosity data (mPa s) for [2][Tf<sub>2</sub>N]

| °C  | [2][Tf <sub>2</sub> N] |
|-----|------------------------|
| -20 | 87200                  |
| -16 | 47100                  |
| -10 | 21100                  |
| -6  | 13000                  |
| 0   | 6860                   |
| 4   | 4260                   |
| 10  | 2410                   |
| 14  | 1740                   |
| 20  | 1100                   |
| 25  | 775                    |
| 30  | 549                    |
| 34  | 428                    |
| 40  | 296                    |
| 44  | 236                    |
| 50  | 172                    |

**Table S4** Crystallographic parameters

|                                                                                                                     | [2][PF <sub>6</sub> ]                               | [3][PF <sub>6</sub> ]                               | [3][FSA]                                                                        |
|---------------------------------------------------------------------------------------------------------------------|-----------------------------------------------------|-----------------------------------------------------|---------------------------------------------------------------------------------|
| Empirical formula                                                                                                   | C <sub>20</sub> H <sub>29</sub> F <sub>6</sub> OPRu | C <sub>20</sub> H <sub>29</sub> F <sub>6</sub> OPRu | C <sub>20</sub> H <sub>29</sub> F <sub>2</sub> NO <sub>5</sub> RuS <sub>2</sub> |
| Formula weight                                                                                                      | 531.47                                              | 531.47                                              | 566.63                                                                          |
| Crystal system                                                                                                      | Triclinic                                           | Triclinic                                           | Triclinic                                                                       |
| Space group                                                                                                         | <i>P</i> -1                                         | <i>P</i> -1                                         | <i>P</i> -1                                                                     |
| <i>a</i> (Å)                                                                                                        | 7.2400(9)                                           | 10.389(3)                                           | 7.928(3)                                                                        |
| <i>b</i> (Å)                                                                                                        | 18.137(2)                                           | 10.393(3)                                           | 9.542(4)                                                                        |
| <i>c</i> (Å)                                                                                                        | 18.786(2)                                           | 11.050(3)                                           | 16.403(6)                                                                       |
| $\alpha$ (°)                                                                                                        | 114.7030(10)                                        | 84.703(4)                                           | 98.073(5)                                                                       |
| $\beta$ (°)                                                                                                         | 94.018(2)                                           | 67.159(4)                                           | 101.571(4)                                                                      |
| $\gamma$ (°)                                                                                                        | 97.896(2)                                           | 82.242(4)                                           | 103.610(4)                                                                      |
| Volume (Å <sup>3</sup> )                                                                                            | 2197.4(5)                                           | 1088.4(5)                                           | 1158.3(8)                                                                       |
| <i>Z</i>                                                                                                            | 4                                                   | 2                                                   | 2                                                                               |
| <i>d</i> <sub>calcd.</sub> (mg m <sup>-3</sup> )                                                                    | 1.606                                               | 1.622                                               | 1.625                                                                           |
| <i>T</i> (K)                                                                                                        | 100                                                 | 100                                                 | 100                                                                             |
| $\mu$ (mm <sup>-1</sup> )                                                                                           | 0.845                                               | 0.853                                               | 0.904                                                                           |
| Reflections collected                                                                                               | 10721                                               | 5053                                                | 5408                                                                            |
| Independent reflections                                                                                             | 7656<br>( <i>R</i> <sub>int</sub> = 0.0204)         | 3740<br>( <i>R</i> <sub>int</sub> = 0.0162)         | 4022<br>( <i>R</i> <sub>int</sub> = 0.0260)                                     |
| <i>F</i> (000)                                                                                                      | 1080                                                | 540                                                 | 580                                                                             |
| <i>R</i> <sub>1</sub> <sup><i>a</i></sup> , <i>wR</i> <sub>2</sub> <sup><i>b</i></sup> ( <i>I</i> > 2σ( <i>I</i> )) | 0.0258, 0.0656                                      | 0.0256, 0.0579                                      | 0.0577, 0.1556                                                                  |
| <i>R</i> <sub>1</sub> <sup><i>a</i></sup> , <i>wR</i> <sub>2</sub> <sup><i>b</i></sup> (all data)                   | 0.0286, 0.0679                                      | 0.0292, 0.0597                                      | 0.0610, 0.1629                                                                  |
| Goodness-of-fit on <i>F</i> <sup>2</sup>                                                                            | 1.038                                               | 1.060                                               | 1.114                                                                           |
| Completeness to $\theta$ (%)                                                                                        | 98.3                                                | 97.3                                                | 98.0                                                                            |
| Parameters                                                                                                          | 587                                                 | 263                                                 | 281                                                                             |
| Largest diff. peak and hole                                                                                         | 1.040 and -0.562                                    | 0.554 and -0.473                                    | 2.362 and -1.235                                                                |

$$^a R_1 = \sum ||F_o| - |F_c|| / \sum |F_o|, \text{ b) } wR_2 = [\sum w(F_o^2 - F_c^2)^2 / \sum w(F_o^2)^2]^{1/2}$$
